# Supplementary material
Source: PubMed Central journal article supplement (PMC5033696)
Supplement: NIHMS799688-supplement-Supp_Info.pdf [file NIHMS799688-supplement-Supp_Info.pdf]

## Supplementary Information

**Figure S1. OCA lowers plasma bile acid levels by activation of hepatic and intestinal FXR.** *Fxr<sup>fl/fl</sup>* mice, *L-Fxr<sup>-/-</sup>* mice and *I-Fxr<sup>-/-</sup>* mice were gavaged with either vehicle or OCA for 7 days (n=6). Plasma bile acid levels were determined. \*  $p<0.05$ , \*\*  $p<0.01$  compared to the vehicle-treated control group of the same genotype.

**Figure S2. OCA induces hepatic SR-BI expression.** Wild-type mice were gavaged with either vehicle or OCA (n=6). Hepatic SR-BI mRNA (A) and protein (B) levels were determined. \*\*  $p<0.01$

**Figure S3. OCA treatment does not affect biliary cholesterol secretion but inhibits biliary bile acid secretion through activation of both hepatic and intestinal FXR.** (A-C) Wild-type and *Fxr<sup>-/-</sup>* mice were gavaged with either vehicle or OCA for 7 days (n=6). After gallbladder was cannulated, the rates of bile acid secretion (A), bile flow (B) and biliary cholesterol secretion (C) were determined. (D-F) *Fxr<sup>fl/fl</sup>* mice, *L-Fxr<sup>-/-</sup>* mice and *I-Fxr<sup>-/-</sup>* mice were gavaged with either vehicle or OCA for 7 days (n=6). The rates of biliary bile acid secretion (D) and bile flow (E) were determined. \*  $p<0.05$ , \*\*  $p<0.01$  compared to vehicle-treated control group of the same genotype.

**Figure S4. OCA treatment inhibits intestinal cholesterol absorption through activation of hepatic FXR.** *Fxr<sup>fl/fl</sup>* mice, *L-Fxr<sup>-/-</sup>* mice and *I-Fxr<sup>-/-</sup>* mice were gavaged with either vehicle or OCA for 7 days (n=6). Intestinal cholesterol absorption was

determined. \*  $p < 0.05$  compared to the vehicle-treated control group of the same genotype.

**Figure S5. Effect of CYP7A1 and/or CYP8B1 over-expression on cholesterol absorption in wild-type mice.** C57BL/6 mice were i.v. injected with Ad-GFP, Ad-rCyp7a1 and/or Ad-mCyp8b1 (n=6-7). On day 8, mice were given [<sup>3</sup>H]cholesterol and [<sup>14</sup>C]cholesterol and intestinal cholesterol absorption was performed using dual-isotope plasma ratio method (A). Hepatic *Cyp7a1* (B), rat *Cyp7a1* (C) and *Cyp8b1* (D) mRNA levels as well as protein levels (E) were determined. \*  $p < 0.05$ , \*\*  $p < 0.01$  compared to Ad-GFP-treated mice.

**Figure S6. Effect of CYP7A1 and/or CYP8B1 over-expression on bile acid levels in the intestine, liver and gallbladder.** C57BL/6 mice were i.v. injected with Ad-GFP, Ad-rCyp7a1 and/or Ad-mCyp8b1 (n=6-7). After 7 days, bile acids in the intestine (A), liver (B) and gallbladder (C) as well as total bile acid levels (D) were determined. \*  $p < 0.05$ , \*\*  $p < 0.01$  compared to Ad-GFP-treated mice.

**Figure S1**

**Bile acids ( $\mu\text{M}$ )**

**Figure S2**

**A**

Relative mRNA

**B**

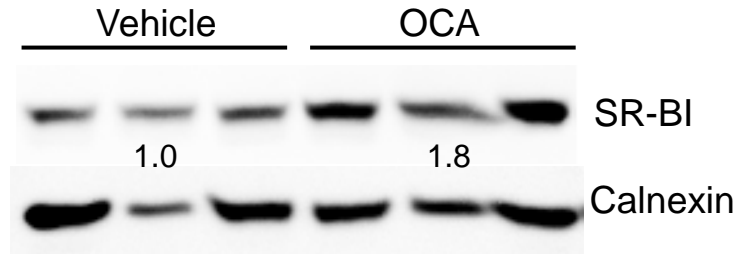

**Figure S3**

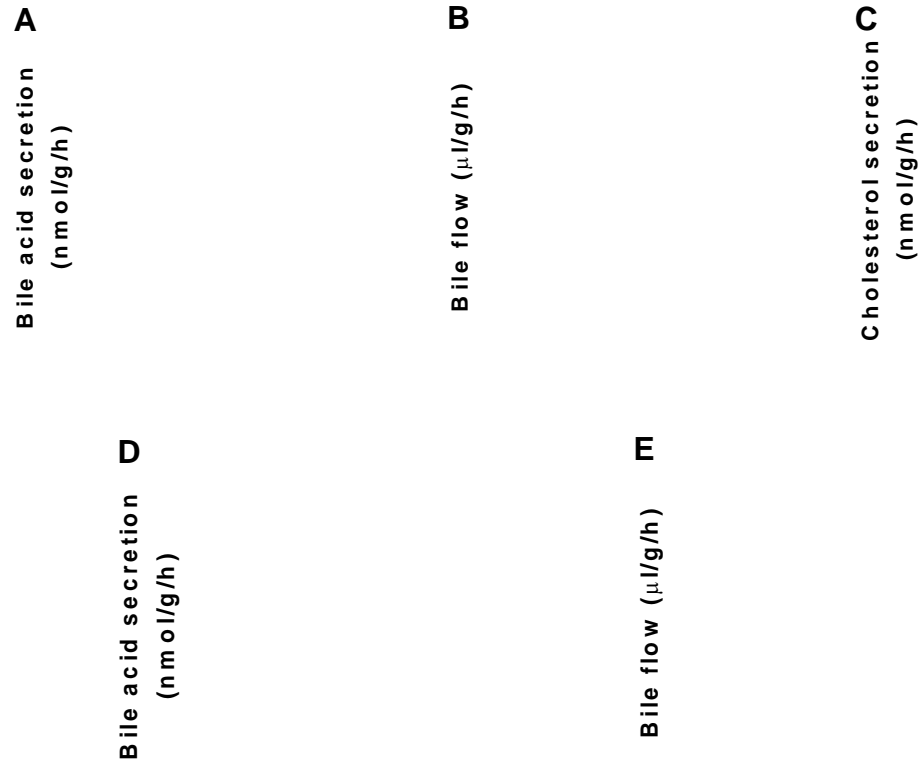

**Figure S4**

**Chol absorption (%)**

**Figure S5**

**A**

Chol absorption (%)

**B**

Relative mRNA

**C**

Relative mRNA

**D**

Relative mRNA

**E**

|            |   |   |   |   |
|------------|---|---|---|---|
| Ad-GFP     | + | - | - | - |
| Ad-rCyp7a1 | - | + | - | + |
| Ad-mCyp8b1 | - | - | + | + |

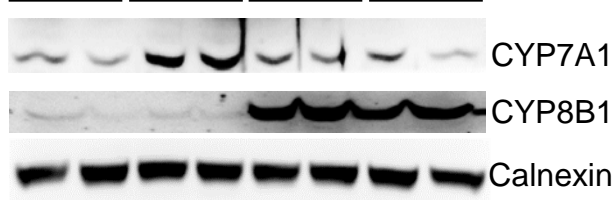

**Figure S6**

**A**

**Bile acids ( $\mu\text{mol}$ )**

**B**

**Bile acids ( $\mu\text{mol}$ )**

**C**

**Bile acids ( $\mu\text{mol}$ )**

**D**

**Bile acids ( $\mu\text{mol}$ )**
